# Supplementary material for: Augmented Antitumor Effect of Unripe Rubus coreanus Miquel Combined with Oxaliplatin in a Humanized PD-1/PD-L1 Knock-In Colorectal Cancer Mouse Model
Source: MDPI journal article supplement (doi:10.3390/cells11182876), 2022-09-14
Supplement: s1 [file s1]

## Supplementary materials

### *Combination index (CI) of RCE plus Oxa*

The combination of RCE and Oxa was quantitatively determined using the Chou–Talalay method for drug combinations [1,2]. The combination index (CI) values were based on the drug–drug interactions and effect equation and calculated using the formula  $CI = (D_1/D_{X1}) + (D_2/D_{X2})$ , where  $D_1$  and  $D_2$  represent the doses of drugs 1 and 2 when the combination reached a certain cell viability inhibitory rate and  $D_{X1}$  and  $D_{X2}$  represent the doses of single drugs 1 and 2 under the cell viability inhibitory rate. A CI value  $<1$  indicates synergism,  $CI = 1$  indicates additive interaction, and  $CI > 1$  indicates antagonism. In our study, CI values were determined for each concentration of RCE and Oxa and their combination in the co-culture cell model with hPD-L1 MC38 cells and hPD-1 tumor-infiltrating  $CD3^+CD8^+$  T cells for 72 h.

## Supplementary References

1. Chou, T.C.; Talalay, P. Quantitative analysis of dose-effect relationships: the combined effects of multiple drugs or enzyme inhibitors. *Adv Enzyme Regul* **1984**, *22*, 27-55, doi:10.1016/0065-2571(84)90007-4.
2. Chou, T.C. Theoretical basis, experimental design, and computerized simulation of synergism and antagonism in drug combination studies. *Pharmacol Rev* **2006**, *58*, 621-681, doi:10.1124/pr.58.3.10.
